# Supplementary material
Source: MDPI journal article supplement (https://www.mdpi.com/2077-0472/12/5/679)
Supplement: s1 [file s1 › agriculture-1629348-supplementary.pdf]

## Supplementary Information

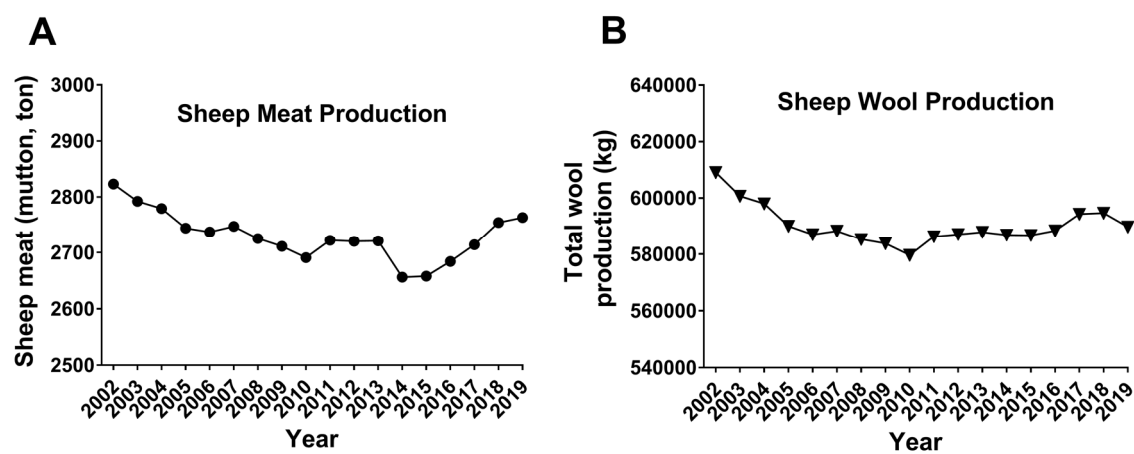

Figure S1. Status of sheep meat (A) and wool production (B) [1].

### Reference:

1. MOALD. Statistical Information on Nepalese Agriculture (2016/2017); Ministry of Agriculture and Livestock Development: Kathmandu, Nepal, 2017.
